# Supplementary material
Source: PubMed Central journal article supplement (PMC9635189)
Supplement: 12889_2022_14442_MOESM1_ESM.pdf [file 12889_2022_14442_MOESM1_ESM.pdf]

**Additional file 1. SURVEYING THE KNOWLEDGE, ATTITUDE, AND PRACTICES OF  
UNIVERSITY STUDENTS REGARDING COVID-19**

Dear students. The research team from Phenikaa University is conducting a study to survey university students' knowledge, attitude, and practices regarding the COVID-19 pandemic in Vietnam. The time for answering questions is about 10 to 15 minutes. All information in this data collection form is only used for studying. We hope that you will answer questions fully and honestly. The identity of participants will be kept confidential. We truly appreciate your participation and contribution to our research.

Do you agree to take part in this survey?

Yes

No

| No                           | Questions                                                                         | Answers                                                                                                                                                                                                                                                                          |
|------------------------------|-----------------------------------------------------------------------------------|----------------------------------------------------------------------------------------------------------------------------------------------------------------------------------------------------------------------------------------------------------------------------------|
| <b>Students' information</b> |                                                                                   |                                                                                                                                                                                                                                                                                  |
| I1                           | Sex                                                                               | <input type="checkbox"/> Male<br><input type="checkbox"/> Female                                                                                                                                                                                                                 |
| I2                           | Age                                                                               |                                                                                                                                                                                                                                                                                  |
| I3                           | Province (home location)                                                          | Province: .....                                                                                                                                                                                                                                                                  |
| I4                           | Place of residence                                                                | <input type="checkbox"/> Urban<br><input type="checkbox"/> Rural                                                                                                                                                                                                                 |
| I5                           | Year of study                                                                     | <input type="checkbox"/> First<br><input type="checkbox"/> Second<br><input type="checkbox"/> Third<br><input type="checkbox"/> Fourth<br><input type="checkbox"/> Fifth                                                                                                         |
| I6                           | Name of faculty/department                                                        | .....                                                                                                                                                                                                                                                                            |
| I7                           | The people who are living with you                                                | <input type="checkbox"/> My family (grandparents, parents, husband/wife, siblings...)<br><input type="checkbox"/> Relatives (aunts, uncles...)<br><input type="checkbox"/> Friends<br><input type="checkbox"/> Alone<br><input type="checkbox"/> Others: .....<br>.....<br>..... |
| I8                           | Have you ever been infected with COVID-19?                                        | <input type="checkbox"/> Yes<br><input type="checkbox"/> No<br><input type="checkbox"/> I don't know                                                                                                                                                                             |
| I9                           | Have you ever participated in COVID-19 volunteer activities in health facilities? | <input type="checkbox"/> Already<br><input type="checkbox"/> Never                                                                                                                                                                                                               |
| I10                          | The number of doses of COVID-19 vaccines given                                    | .....                                                                                                                                                                                                                                                                            |

| No                  | Questions                                                                                                                                   | Answers                                                                                                                                                                                                                                                                                                                                                                                                                                              |
|---------------------|---------------------------------------------------------------------------------------------------------------------------------------------|------------------------------------------------------------------------------------------------------------------------------------------------------------------------------------------------------------------------------------------------------------------------------------------------------------------------------------------------------------------------------------------------------------------------------------------------------|
| I11                 | Your sources for seeking COVID-19 information                                                                                               | <input type="checkbox"/> Social networks (such as Facebook, Messenger, Zalo apps...), and online newspapers<br><input type="checkbox"/> Friends, family members<br><input type="checkbox"/> Mass media (national news, radio, television...)<br><input type="checkbox"/> Websites of the World Health Organization and the Ministry of Health, and scientific articles<br><input type="checkbox"/> Others: .....<br>.....<br>.....<br>.....<br>..... |
| <b>B. Knowledge</b> |                                                                                                                                             |                                                                                                                                                                                                                                                                                                                                                                                                                                                      |
| K1                  | COVID-19 is a disease caused by the SARS-Cov-2 virus.                                                                                       | <input type="checkbox"/> Totally right<br><input type="checkbox"/> Probably right<br><input type="checkbox"/> Don't know<br><input type="checkbox"/> Probably wrong<br><input type="checkbox"/> Totally wrong                                                                                                                                                                                                                                        |
| K2                  | The virus can be transmitted through droplets produced when an infected person coughs, sneezes, or talks.                                   | <input type="checkbox"/> Totally right<br><input type="checkbox"/> Probably right<br><input type="checkbox"/> Don't know<br><input type="checkbox"/> Probably wrong<br><input type="checkbox"/> Totally wrong                                                                                                                                                                                                                                        |
| K3                  | You can be infected with COVID-19 when touching contaminated surfaces, not washing your hands, and then touching your eyes, nose, or mouth. | <input type="checkbox"/> Totally right<br><input type="checkbox"/> Probably right<br><input type="checkbox"/> Don't know<br><input type="checkbox"/> Probably wrong<br><input type="checkbox"/> Totally wrong                                                                                                                                                                                                                                        |
| K4                  | The COVID-19 virus can be spread through mosquito bites.                                                                                    | <input type="checkbox"/> Totally right<br><input type="checkbox"/> Probably right<br><input type="checkbox"/> Don't know<br><input type="checkbox"/> Probably wrong<br><input type="checkbox"/> Totally wrong                                                                                                                                                                                                                                        |
| K5                  | Exposure to or eating wild animals can lead to COVID-19 infection.                                                                          | <input type="checkbox"/> Totally right<br><input type="checkbox"/> Probably right<br><input type="checkbox"/> Don't know<br><input type="checkbox"/> Probably wrong<br><input type="checkbox"/> Totally wrong                                                                                                                                                                                                                                        |

| No  | Questions                                                                                                                                      | Answers                                                                                                                                                                                                       |
|-----|------------------------------------------------------------------------------------------------------------------------------------------------|---------------------------------------------------------------------------------------------------------------------------------------------------------------------------------------------------------------|
| K6  | PCR (Polymerase Chain Reaction) can be used to accurately diagnose whether or not a person is infected with COVID-19.                          | <input type="checkbox"/> Totally right<br><input type="checkbox"/> Probably right<br><input type="checkbox"/> Don't know<br><input type="checkbox"/> Probably wrong<br><input type="checkbox"/> Totally wrong |
| K7  | Symptoms of COVID-19 infection can include fever, cough, fatigue, shortness of breath, and loss of taste/smell.                                | <input type="checkbox"/> Totally right<br><input type="checkbox"/> Probably right<br><input type="checkbox"/> Don't know<br><input type="checkbox"/> Probably wrong<br><input type="checkbox"/> Totally wrong |
| K8  | Unlike the common cold, runny nose and sneezing are less common in COVID-19 patients.                                                          | <input type="checkbox"/> Totally right<br><input type="checkbox"/> Probably right<br><input type="checkbox"/> Don't know<br><input type="checkbox"/> Probably wrong<br><input type="checkbox"/> Totally wrong |
| K9  | A person can be infected with COVID-19 without any unusual symptoms.                                                                           | <input type="checkbox"/> Totally right<br><input type="checkbox"/> Probably right<br><input type="checkbox"/> Don't know<br><input type="checkbox"/> Probably wrong<br><input type="checkbox"/> Totally wrong |
| K10 | Patients with chronic medical conditions, the elderly, and the obese have a lower risk of mortality and milder symptoms of COVID-19 infection. | <input type="checkbox"/> Totally right<br><input type="checkbox"/> Probably right<br><input type="checkbox"/> Don't know<br><input type="checkbox"/> Probably wrong<br><input type="checkbox"/> Totally wrong |
| K11 | Washing hands with soap, using face masks, and limiting crowded gatherings are some effective measures to help prevent COVID-19.               | <input type="checkbox"/> Totally right<br><input type="checkbox"/> Probably right<br><input type="checkbox"/> Don't know<br><input type="checkbox"/> Probably wrong<br><input type="checkbox"/> Totally wrong |
| K12 | Hydroxychloroquine may help prevent infection or death from COVID-19.                                                                          | <input type="checkbox"/> Totally right<br><input type="checkbox"/> Probably right<br><input type="checkbox"/> Don't know<br><input type="checkbox"/> Probably wrong<br><input type="checkbox"/> Totally wrong |
| K13 | Antibiotics are the first choice to treat COVID-19.                                                                                            | <input type="checkbox"/> Totally right<br><input type="checkbox"/> Probably right<br><input type="checkbox"/> Don't know<br><input type="checkbox"/> Probably wrong<br><input type="checkbox"/> Totally wrong |

| No                 | Questions                                                                                              | Answers                                                                                                                                                                                                       |
|--------------------|--------------------------------------------------------------------------------------------------------|---------------------------------------------------------------------------------------------------------------------------------------------------------------------------------------------------------------|
| K14                | Adding pepper, ginger, and garlic to food does not help prevent and treat COVID-19.                    | <input type="checkbox"/> Totally right<br><input type="checkbox"/> Probably right<br><input type="checkbox"/> Don't know<br><input type="checkbox"/> Probably wrong<br><input type="checkbox"/> Totally wrong |
| K15                | Drinking alcohol and exposure to sunlight/temperatures higher than 25°C can help prevent COVID-19.     | <input type="checkbox"/> Totally right<br><input type="checkbox"/> Probably right<br><input type="checkbox"/> Don't know<br><input type="checkbox"/> Probably wrong<br><input type="checkbox"/> Totally wrong |
| K16                | Vitamins and minerals can help prevent COVID-19 in healthy people or cure COVID-19 in infected people. | <input type="checkbox"/> Totally right<br><input type="checkbox"/> Probably right<br><input type="checkbox"/> Don't know<br><input type="checkbox"/> Probably wrong<br><input type="checkbox"/> Totally wrong |
| <b>C. Attitude</b> |                                                                                                        |                                                                                                                                                                                                               |
| A1                 | COVID-19 is an extremely dangerous disease.                                                            | <input type="checkbox"/> Totally agree<br><input type="checkbox"/> Agree<br><input type="checkbox"/> Neutral<br><input type="checkbox"/> Disagree<br><input type="checkbox"/> Totally disagree                |
| A2                 | I feel very anxious when watching or reading the news about COVID-19.                                  | <input type="checkbox"/> Totally agree<br><input type="checkbox"/> Agree<br><input type="checkbox"/> Neutral<br><input type="checkbox"/> Disagree<br><input type="checkbox"/> Totally disagree                |
| A3                 | I feel apprehensive and insecure if I, my friends, or my family members are infected with COVID-19.    | <input type="checkbox"/> Totally agree<br><input type="checkbox"/> Agree<br><input type="checkbox"/> Neutral<br><input type="checkbox"/> Disagree<br><input type="checkbox"/> Totally disagree                |
| A4                 | Children and adolescents do not need to take any measures to prevent COVID-19.                         | <input type="checkbox"/> Totally agree<br><input type="checkbox"/> Agree<br><input type="checkbox"/> Neutral<br><input type="checkbox"/> Disagree<br><input type="checkbox"/> Totally disagree                |
| A5                 | I will always comply with the COVID-19 prevention guidelines of the Ministry of Health.                | <input type="checkbox"/> Totally agree<br><input type="checkbox"/> Agree<br><input type="checkbox"/> Neutral<br><input type="checkbox"/> Disagree                                                             |

| No                   | Questions                                                                                                                               | Answers                                                                                                                                                                                        |
|----------------------|-----------------------------------------------------------------------------------------------------------------------------------------|------------------------------------------------------------------------------------------------------------------------------------------------------------------------------------------------|
|                      |                                                                                                                                         | <input type="checkbox"/> Totally disagree                                                                                                                                                      |
| A6                   | Wearing face masks is very effective in preventing COVID-19.                                                                            | <input type="checkbox"/> Totally agree<br><input type="checkbox"/> Agree<br><input type="checkbox"/> Neutral<br><input type="checkbox"/> Disagree<br><input type="checkbox"/> Totally disagree |
| A7                   | If infected with the virus, I am ready to go to quarantine at medical facilities or self-isolate at home in case my symptoms are mild.  | <input type="checkbox"/> Totally agree<br><input type="checkbox"/> Agree<br><input type="checkbox"/> Neutral<br><input type="checkbox"/> Disagree<br><input type="checkbox"/> Totally disagree |
| A8                   | When a person is infected with COVID-19, making a medical declaration is really necessary.                                              | <input type="checkbox"/> Totally agree<br><input type="checkbox"/> Agree<br><input type="checkbox"/> Neutral<br><input type="checkbox"/> Disagree<br><input type="checkbox"/> Totally disagree |
| A9                   | I am willing to volunteer at medical facilities to support the fight against the COVID-19 pandemic if necessary.                        | <input type="checkbox"/> Totally agree<br><input type="checkbox"/> Agree<br><input type="checkbox"/> Neutral<br><input type="checkbox"/> Disagree<br><input type="checkbox"/> Totally disagree |
| A10                  | The government should not let overseas Vietnamese return home during the outbreak of the COVID-19 pandemic.                             | <input type="checkbox"/> Totally agree<br><input type="checkbox"/> Agree<br><input type="checkbox"/> Neutral<br><input type="checkbox"/> Disagree<br><input type="checkbox"/> Totally disagree |
| A11                  | Updating COVID-19 information regularly to know how to prevent this disease and avoid misinformation is really necessary and important. | <input type="checkbox"/> Totally agree<br><input type="checkbox"/> Agree<br><input type="checkbox"/> Neutral<br><input type="checkbox"/> Disagree<br><input type="checkbox"/> Totally disagree |
| A12                  | I think the COVID-19 pandemic will be successfully controlled soon.                                                                     | <input type="checkbox"/> Totally agree<br><input type="checkbox"/> Agree<br><input type="checkbox"/> Neutral<br><input type="checkbox"/> Disagree<br><input type="checkbox"/> Totally disagree |
| <b>D. Practices</b>  |                                                                                                                                         |                                                                                                                                                                                                |
| In the past month... |                                                                                                                                         |                                                                                                                                                                                                |
| P1                   | There was a time when I went out of the house without wearing a face mask.                                                              | <input type="checkbox"/> Yes<br><input type="checkbox"/> No                                                                                                                                    |

| No  | Questions                                                                                                                              | Answers                                                     |
|-----|----------------------------------------------------------------------------------------------------------------------------------------|-------------------------------------------------------------|
| P2  | I usually avoided gathering/going out with friends and relatives.                                                                      | <input type="checkbox"/> Yes<br><input type="checkbox"/> No |
| P3  | To limit the spread of COVID-19, I rarely left my house.                                                                               | <input type="checkbox"/> Yes<br><input type="checkbox"/> No |
| P4  | I usually avoided touching my eyes, nose, and mouth directly.                                                                          | <input type="checkbox"/> Yes<br><input type="checkbox"/> No |
| P5  | I regularly washed my hands with soap, alcohol, or hand sanitizer for at least 20 seconds after sneezing, coughing, and before eating. | <input type="checkbox"/> Yes<br><input type="checkbox"/> No |
| P6  | I usually wore a face mask when I had close contact and talked with others.                                                            | <input type="checkbox"/> Yes<br><input type="checkbox"/> No |
| P7  | I usually avoided shaking hands, hugging, or kissing others.                                                                           | <input type="checkbox"/> Yes<br><input type="checkbox"/> No |
| P8  | I usually maintained a distance of at least one meter from others.                                                                     | <input type="checkbox"/> Yes<br><input type="checkbox"/> No |
| P9  | I limited my use of public transport.                                                                                                  | <input type="checkbox"/> Yes<br><input type="checkbox"/> No |
| P10 | I bought antibiotics to prevent COVID-19.                                                                                              | <input type="checkbox"/> Yes<br><input type="checkbox"/> No |
| P11 | I bought antipyretics (such as paracetamol) and electrolyte balance solutions (such as oral rehydration salts) for backup.             | <input type="checkbox"/> Yes<br><input type="checkbox"/> No |
| P12 | I bought antiviral drugs (such as molnupiravir) to keep at home.                                                                       | <input type="checkbox"/> Yes<br><input type="checkbox"/> No |

Thank you for assisting us in data collection.

Best regards.
