# Supplementary material
Source: PubMed Central journal article supplement (PMC9635189)
Supplement: 12889_2022_14442_MOESM2_ESM.pdf [file 12889_2022_14442_MOESM2_ESM.pdf]

**Additional file 2.**

**The mean knowledge, attitude, and practice scores of university students regarding COVID-19**

| No. | Characteristics    |              | Number | Knowledge    |         | Attitude     |         | Practice     |         |
|-----|--------------------|--------------|--------|--------------|---------|--------------|---------|--------------|---------|
|     |                    |              |        | Mean (SD)    | p-value | Mean (SD)    | p-value | Mean (SD)    | p-value |
| 1   | Sex                | Male         | 312    | 17.01 (4.55) | <0.0001 | 42.79 (4.39) | <0.0001 | 8.77 (1.97)  | <0.0001 |
|     |                    | Female       | 713    | 18.67 (4.44) |         | 44.79 (3.79) |         | 9.36 (1.84)  |         |
| 2   | Age                | 18           | 245    | 17.06 (4.59) | <0.0001 | 43.93 (3.98) | 0.00187 | 8.67 (1.86)  | <0.0001 |
|     |                    | 19           | 366    | 17.31 (4.00) |         | 43.91 (3.91) |         | 8.94 (1.91)  |         |
|     |                    | 20           | 189    | 18.46 (4.66) |         | 43.79 (4.03) |         | 9.35 (1.75)  |         |
|     |                    | 21           | 70     | 19.47 (4.59) |         | 44.66 (4.15) |         | 9.76 (1.83)  |         |
|     |                    | 22 and above | 155    | 20.97 (4.12) |         | 45.46 (4.47) |         | 10.11 (1.73) |         |
| 3   | Year of study      | First        | 570    | 17.21 (4.33) | <0.0001 | 43.85 (4.00) | 0.00145 | 8.82 (1.90)  | <0.0001 |
|     |                    | Second       | 242    | 18.29 (4.45) |         | 43.99 (3.88) |         | 9.22 (1.80)  |         |
|     |                    | Third        | 83     | 20.52 (3.92) |         | 45.48 (4.15) |         | 10.13 (1.57) |         |
|     |                    | Fourth       | 71     | 20.56 (4.77) |         | 45.42 (4.59) |         | 10.27 (1.67) |         |
|     |                    | Fifth        | 59     | 20.63 (4.25) |         | 44.88 (4.39) |         | 9.86 (1.87)  |         |
| 4   | Major              | Medical      | 494    | 19.97 (3.99) | <0.0001 | 45.10 (3.94) | <0.0001 | 9.72 (1.78)  | <0.0001 |
|     |                    | Non-medical  | 531    | 16.48 (4.37) |         | 43.33 (4.03) |         | 8.68 (1.87)  |         |
| 5   | Place of residence | Urban        | 408    | 18.75 (4.64) | <0.0001 | 44.37 (4.27) | 0.1847  | 9.36 (1.86)  | 0.01554 |
|     |                    | Rural        | 617    | 17.78 (4.43) |         | 44.06 (3.96) |         | 9.07 (1.92)  |         |

| No. | Characteristics                                  |                                          | Number | Knowledge    |         | Attitude     |         | Practice    |         |
|-----|--------------------------------------------------|------------------------------------------|--------|--------------|---------|--------------|---------|-------------|---------|
|     |                                                  |                                          |        | Mean (SD)    | p-value | Mean (SD)    | p-value | Mean (SD)   | p-value |
| 6   | Province<br>(home location)                      | Hanoi                                    | 305    | 17.83 (4.96) | 0.2521  | 43.95 (4.17) | 0.2422  | 9.18 (1.87) | 0.4315  |
|     |                                                  | Namdinh                                  | 90     | 18.42 (4.51) |         | 44.51 (4.02) |         | 9.62 (1.64) |         |
|     |                                                  | Thanhhoa                                 | 65     | 17.74 (4.93) |         | 43.49 (3.73) |         | 8.97 (1.57) |         |
|     |                                                  | Haiduong                                 | 59     | 18.53 (4.09) |         | 44.47 (4.26) |         | 8.88 (2.27) |         |
|     |                                                  | Thaibinh                                 | 55     | 18.00 (4.23) |         | 44.95 (4.09) |         | 9.18 (2.06) |         |
|     |                                                  | Bacninh                                  | 53     | 17.19 (4.50) |         | 43.42 (4.18) |         | 8.87 (2.17) |         |
|     |                                                  | Hungyen                                  | 38     | 18.34 (3.69) |         | 43.79 (3.65) |         | 9.21 (1.79) |         |
|     |                                                  | Bacgiang                                 | 37     | 17.86 (3.71) |         | 43.95 (3.99) |         | 9.49 (1.54) |         |
|     |                                                  | Haiphong                                 | 34     | 17.76 (4.54) |         | 43.82 (4.55) |         | 9.09 (1.88) |         |
|     |                                                  | Others                                   | 289    | 18.73 (4.31) |         | 44.54 (4.03) |         | 9.19 (1.95) |         |
| 7   | The people living with<br>the student            | Alone                                    | 69     | 17.65 (5.97) | <0.0001 | 43.71 (4.36) | 0.00881 | 8.97 (2.10) | <0.0001 |
|     |                                                  | Friends                                  | 509    | 17.53 (4.37) |         | 43.89 (4.09) |         | 8.93 (1.84) |         |
|     |                                                  | Family<br>(such as parents, siblings...) | 447    | 18.96 (4.35) |         | 44.58 (4.01) |         | 9.51 (1.88) |         |
| 8   | Number of doses of<br>COVID-19 vaccines<br>given | No or 1                                  | 10     | 16.80 (5.71) | 0.433   | 45.90 (4.15) | 0.6368  | 8.70 (2.79) | 0.1178  |
|     |                                                  | 2                                        | 214    | 18.02 (4.45) |         | 44.22 (4.30) |         | 9.04 (1.87) |         |
|     |                                                  | 3                                        | 784    | 18.21 (4.55) |         | 44.15 (4.00) |         | 9.25 (1.88) |         |
|     |                                                  | >3                                       | 17     | 18.47 (4.67) |         | 43.94 (5.38) |         | 8.35 (2.34) |         |

| No. | Characteristics                                                    |                                                                                            | Number | Knowledge    |              | Attitude     |              | Practice    |             |         |
|-----|--------------------------------------------------------------------|--------------------------------------------------------------------------------------------|--------|--------------|--------------|--------------|--------------|-------------|-------------|---------|
|     |                                                                    |                                                                                            |        | Mean (SD)    | p-value      | Mean (SD)    | p-value      | Mean (SD)   | p-value     |         |
| 9   | Infected with COVID-19                                             | Yes                                                                                        | 616    | 18.16 (4.48) | 0.9818       | 44.16 (4.11) | 0.5475       | 9.12 (1.89) | 0.1239      |         |
|     |                                                                    | No/don't know                                                                              | 409    | 18.17 (4.62) |              | 44.22 (4.05) |              | 9.28 (1.91) |             |         |
| 10  | Participated in COVID-19 volunteer activities in health facilities | Already                                                                                    | 192    | 18.35 (4.61) | 0.3788       | 44.03 (4.11) | 0.4308       | 9.34 (1.82) | 0.2964      |         |
|     |                                                                    | Never                                                                                      | 833    | 18.12 (4.52) |              | 44.22 (4.08) |              | 9.15 (1.91) |             |         |
| 11  | Sources for seeking COVID-19 information                           | Social networks (Facebook, Zalo apps...), online newspapers                                | Yes    | 898          | 18.21 (4.47) | 0.6265       | 44.19 (4.03) | 0.9286      | 9.15 (1.90) | 0.1269  |
|     |                                                                    |                                                                                            | No     | 127          | 17.85 (5.00) |              | 44.12 (4.46) |             | 9.42 (1.83) |         |
|     |                                                                    | Friends, family members                                                                    | Yes    | 559          | 18.47 (4.32) | 0.03404      | 44.47 (3.85) | 0.01078     | 9.22 (1.85) | 0.5345  |
|     |                                                                    |                                                                                            | No     | 466          | 17.79 (4.76) |              | 43.83 (4.33) |             | 9.14 (1.96) |         |
|     |                                                                    | Mass media (national news, radio, television)                                              | Yes    | 675          | 18.55 (4.37) | 0.00031      | 44.58 (3.87) | <0.0001     | 9.23 (1.90) | 0.2418  |
|     |                                                                    |                                                                                            | No     | 350          | 17.42 (4.76) |              | 43.42 (4.38) |             | 9.09 (1.89) |         |
|     |                                                                    | Websites of the World Health Organization, the Ministry of Health, and scientific articles | Yes    | 584          | 18.74 (4.42) | <0.0001      | 44.78 (3.85) | <0.0001     | 9.39 (1.89) | <0.0001 |
|     |                                                                    |                                                                                            | No     | 441          | 17.39 (4.58) |              | 43.39 (4.25) |             | 8.91 (1.87) |         |
